# Supplementary material for: A systematic review protocol for assessing equity in clinical practice guidelines for traumatic brain injury and homelessness
Source: PubMed Central journal article supplement (PMC9353519; doi:10.3389/fmed.2022.815660), 2022-07-22
Supplement: Table_3.pdf [file Table_3.pdf]

### Supplementary Material 3. Targeted Websites

| #  | Website Name/Organization                                                                  | Link                                                                                                                                                                                                                                        |
|----|--------------------------------------------------------------------------------------------|---------------------------------------------------------------------------------------------------------------------------------------------------------------------------------------------------------------------------------------------|
| 1  | Epistemonikos                                                                              | <a href="https://www.epistemonikos.org/">https://www.epistemonikos.org/</a>                                                                                                                                                                 |
| 2  | National Collaborating Centre for Chronic Conditions                                       | <a href="https://www.guidelinecentral.com/summaries/organizations/national-collaborating-centre-for-chronic-conditions/">https://www.guidelinecentral.com/summaries/organizations/national-collaborating-centre-for-chronic-conditions/</a> |
| 3  | MD Anderson Cancer Centre                                                                  | <a href="https://mdanderson.libguides.com/c.php?g=564859&amp;p=3891068#gsc.tab=0">https://mdanderson.libguides.com/c.php?g=564859&amp;p=3891068#gsc.tab=0</a>                                                                               |
| 4  | American Academy of Physical Medicine and Rehabilitation                                   | <a href="https://www.aapmr.org/">https://www.aapmr.org/</a>                                                                                                                                                                                 |
| 5  | Canadian Alliance to End Homelessness                                                      | <a href="https://caeh.ca/">https://caeh.ca/</a>                                                                                                                                                                                             |
| 6  | Canadian Housing First Toolkit                                                             | <a href="https://housingfirsttoolkit.ca/">https://housingfirsttoolkit.ca/</a>                                                                                                                                                               |
| 7  | Centre for Urban Health Solutions                                                          | <a href="https://maphealth.ca/">https://maphealth.ca/</a>                                                                                                                                                                                   |
| 8  | Cochrane Methods Equity Homeless Health Guidelines                                         | <a href="https://methods.cochrane.org/equity/projects/homeless-health-guidelines">https://methods.cochrane.org/equity/projects/homeless-health-guidelines</a>                                                                               |
| 9  | Evidence Exchange Network for Mental Health and Addictions                                 | <a href="https://www.eenet.ca/">https://www.eenet.ca/</a>                                                                                                                                                                                   |
| 10 | Mental Health Commission of Canada                                                         | <a href="https://mentalhealthcommission.ca/">https://mentalhealthcommission.ca/</a>                                                                                                                                                         |
| 11 | Model Systems Knowledge Translation Center                                                 | <a href="https://msktc.org/">https://msktc.org/</a>                                                                                                                                                                                         |
| 12 | National Association of State Head Injury Administrators                                   | <a href="https://www.nashia.org/">https://www.nashia.org/</a>                                                                                                                                                                               |
| 13 | National Health Care for the Homeless Council                                              | <a href="https://nhchc.org/">https://nhchc.org/</a>                                                                                                                                                                                         |
| 14 | National Institute on Disability, Independent Living and Rehabilitation Research (NIDILRR) | <a href="https://acl.gov/about-acl/about-national-institute-disability-independent-living-and-rehabilitation-research">https://acl.gov/about-acl/about-national-institute-disability-independent-living-and-rehabilitation-research</a>     |
| 15 | Ruff Institute of Global Homelessness                                                      | <a href="https://ighomelessness.org/">https://ighomelessness.org/</a>                                                                                                                                                                       |
| 16 | The Center for Brain Injury Research and Training                                          | <a href="https://cbirt.org/">https://cbirt.org/</a>                                                                                                                                                                                         |
| 17 | The Homeless Hub                                                                           | <a href="https://www.homelesshub.ca/">https://www.homelesshub.ca/</a>                                                                                                                                                                       |

Chan et al. (2022). A systematic review protocol for assessing equity in clinical practice guidelines for traumatic brain injury and homelessness. *Front. Med.* 9:815660.

|    |                                                                 |                                                                                       |
|----|-----------------------------------------------------------------|---------------------------------------------------------------------------------------|
| 18 | Toronto Alliance to End Homelessness                            | <a href="https://taeh.ca/">https://taeh.ca/</a>                                       |
| 19 | Toronto Mental Health and Addictions Supporting Housing Network | <a href="https://tosupportivehousing.ca/">https://tosupportivehousing.ca/</a>         |
| 20 | Wellesley Institute                                             | <a href="https://www.wellesleyinstitute.com/">https://www.wellesleyinstitute.com/</a> |

---

Chan et al. (2022). A systematic review protocol for assessing equity in clinical practice guidelines for traumatic brain injury and homelessness. *Front. Med.* 9:815660.
