# Supplementary material for: A systematic review protocol for assessing equity in clinical practice guidelines for traumatic brain injury and homelessness
Source: PubMed Central journal article supplement (PMC9353519; doi:10.3389/fmed.2022.815660), 2022-07-22
Supplement: Table_4.pdf [file Table_4.pdf]

Chan et al. (2022). A systematic review protocol for assessing equity in clinical practice guidelines for traumatic brain injury and homelessness. *Front. Med.* 9:815660.

Supplementary Material 4 – Study Selection Process for Gray Literature

**Table 1. Targeted Websites to Search for Clinical Practice Guidelines**

Document the targeted website(s) identified in Grey Matters, by the Research Team, and from Google Search that will be searched for CPGs on TBI or homelessness

| # | Date Searched | Name of Website/Organization | Link of Website/Organization | Source<br><i>(i.e., Grey Matters, Research Team, Stakeholder, Google Search)</i> | Search Strategy Applied for Google Search | Number of Items Retrieved/Identified from Search |
|---|---------------|------------------------------|------------------------------|----------------------------------------------------------------------------------|-------------------------------------------|--------------------------------------------------|
|---|---------------|------------------------------|------------------------------|----------------------------------------------------------------------------------|-------------------------------------------|--------------------------------------------------|

- 1
- 2
- 3
- 4
- 5

**Table 2. Stakeholders Contacted**

Document the stakeholders who were contacted for targeted websites and/or relevant CPGs

| # | Name of Individual/Organization | Date Contacted | Number of Items Recommended | Type of Item<br><i>(i.e., Website, CPG)</i> |
|---|---------------------------------|----------------|-----------------------------|---------------------------------------------|
| 1 |                                 |                |                             |                                             |
| 2 |                                 |                |                             |                                             |
| 3 |                                 |                |                             |                                             |
| 4 |                                 |                |                             |                                             |
| 5 |                                 |                |                             |                                             |

**Table 3. Clinical Practice Guidelines Identified from Websites**  
 Document the CPGs on TBI or homelessness identified from targeted website(s)

| # | Date Searched | Authors of CPG | Title of CPG | Link for CPG | Targeted Website<br><i>(i.e., where the CPG was identified)</i> | Search Strategy Applied to Identify CPG | Number of Items Retrieved/Identified from Search<br><i>(i.e., # of CPGs for title and abstract screen)</i> |
|---|---------------|----------------|--------------|--------------|-----------------------------------------------------------------|-----------------------------------------|------------------------------------------------------------------------------------------------------------|
|---|---------------|----------------|--------------|--------------|-----------------------------------------------------------------|-----------------------------------------|------------------------------------------------------------------------------------------------------------|

1  
 2  
 3  
 4  
 5

**Table 4. Title and Abstract Screen of CPGs Identified from Websites**

| # | Item Number in 'CPGs from Websites' Worksheet<br><i>(Note: Used for Tracking Purposes)</i> | Date Screened | Authors | Title of CPG | Link for CPG | <u>Decision</u><br>1= Include/Maybe<br>0 = Exclude |
|---|--------------------------------------------------------------------------------------------|---------------|---------|--------------|--------------|----------------------------------------------------|
| 1 |                                                                                            |               |         |              |              |                                                    |
| 2 |                                                                                            |               |         |              |              |                                                    |
| 3 |                                                                                            |               |         |              |              |                                                    |
| 4 |                                                                                            |               |         |              |              |                                                    |
| 5 |                                                                                            |               |         |              |              |                                                    |

**Table 5. Full-Text Screen of CPGs Identified from Websites**

| # | Item Number in 'CPGs from Websites' Worksheet<br><i>(Note: Used for Tracking Purposes)</i> | Date Screened | Authors | Title of CPG | Link for CPG | <u>Decision</u><br>1 = Include<br>0 = Exclude | <u>Reason for Exclusion</u><br><i>(e.g., Not homelessness, not TBI, no Full-Text (i.e., summaries/editorials), adaptations/translations, recommendations not rated, recommendations not evidence-based)</i> |
|---|--------------------------------------------------------------------------------------------|---------------|---------|--------------|--------------|-----------------------------------------------|-------------------------------------------------------------------------------------------------------------------------------------------------------------------------------------------------------------|
|---|--------------------------------------------------------------------------------------------|---------------|---------|--------------|--------------|-----------------------------------------------|-------------------------------------------------------------------------------------------------------------------------------------------------------------------------------------------------------------|

1  
2  
3  
4  
5
